# Supplementary material for: Mitochondria‐Targeted Antioxidants SkQ1 and MitoTEMPO Failed to Exert a Long‐Term Beneficial Effect in Murine Polymicrobial Sepsis
Source: Hindawi journal article supplement (doi:10.1155/2017/6412682), 2017-01-01

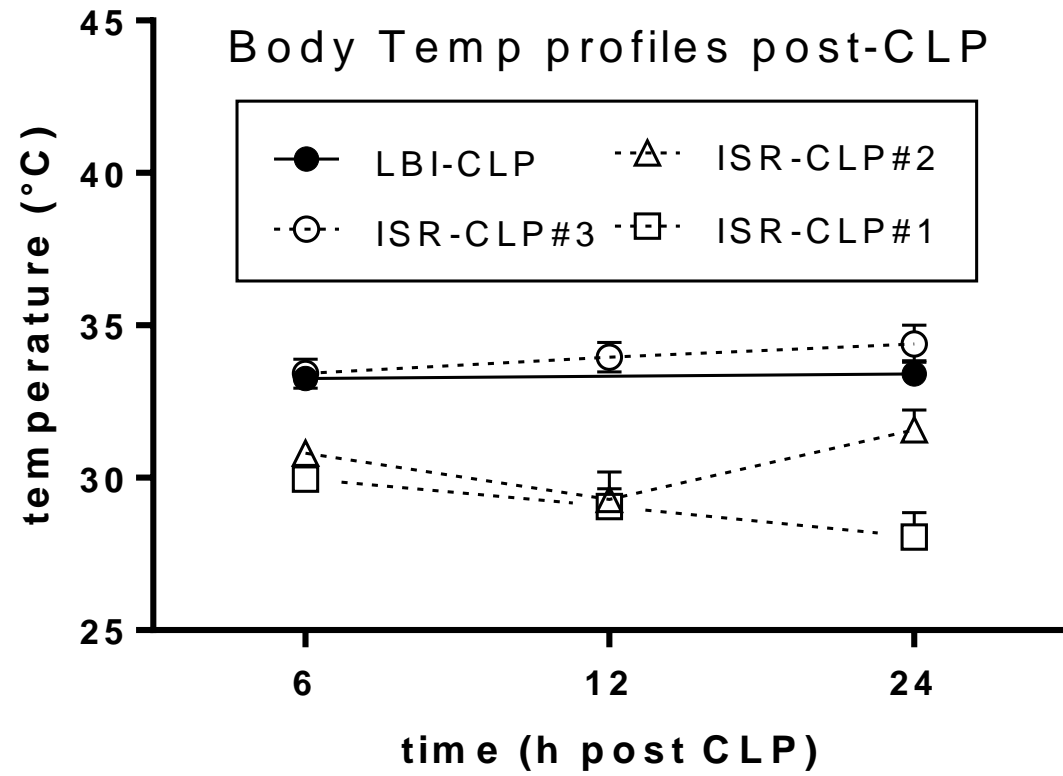

Supplement: f3 [file 6412682.f3.pdf]
