# Supplementary material for: Mitochondria‐Targeted Antioxidants SkQ1 and MitoTEMPO Failed to Exert a Long‐Term Beneficial Effect in Murine Polymicrobial Sepsis
Source: Hindawi journal article supplement (doi:10.1155/2017/6412682), 2017-01-01

CLP Run 1

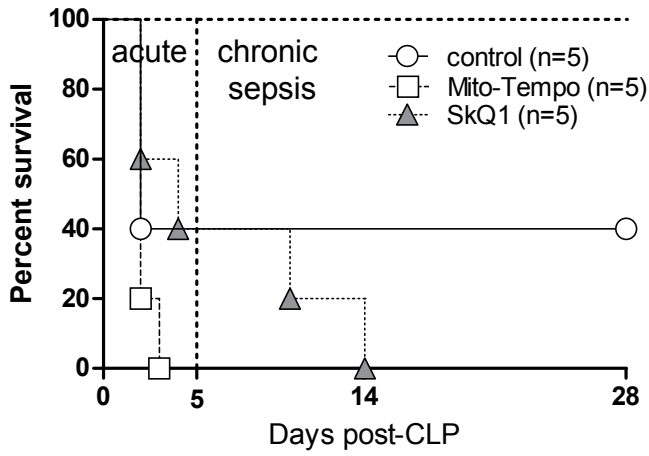

CLP Run 2

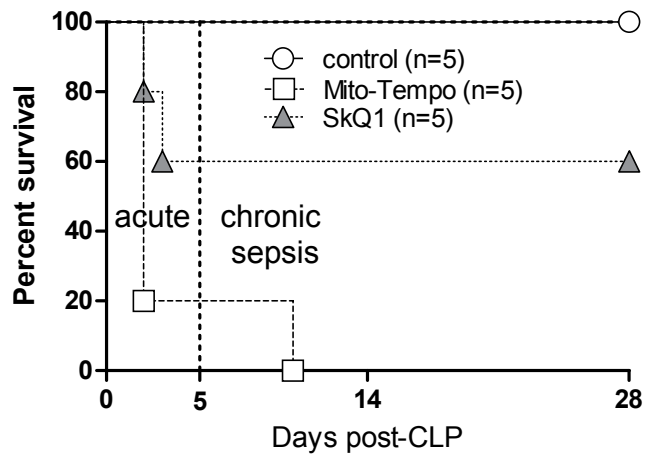

CLP Run 3

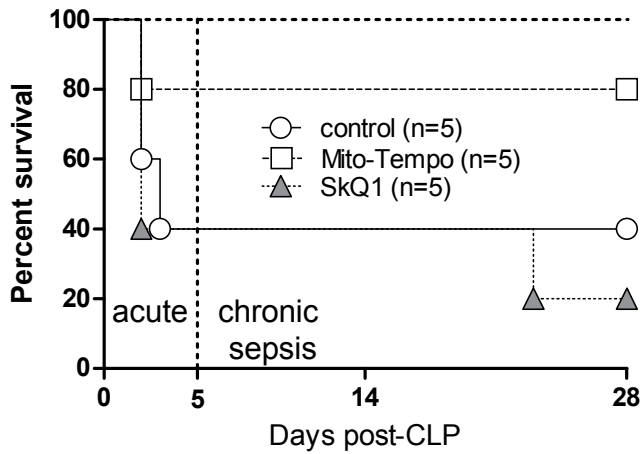

CLP Run 4

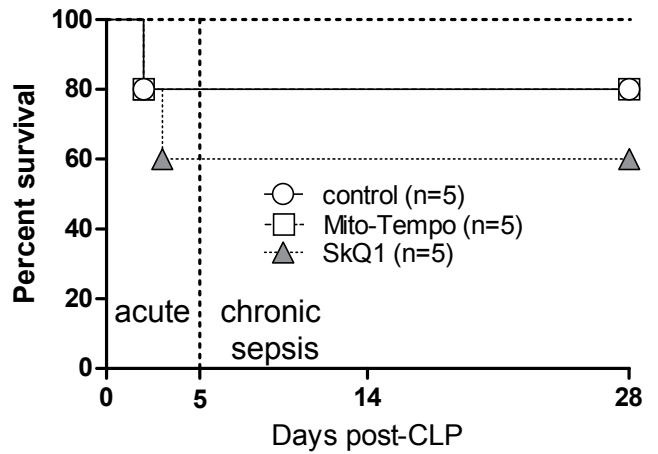

CLP Run 5

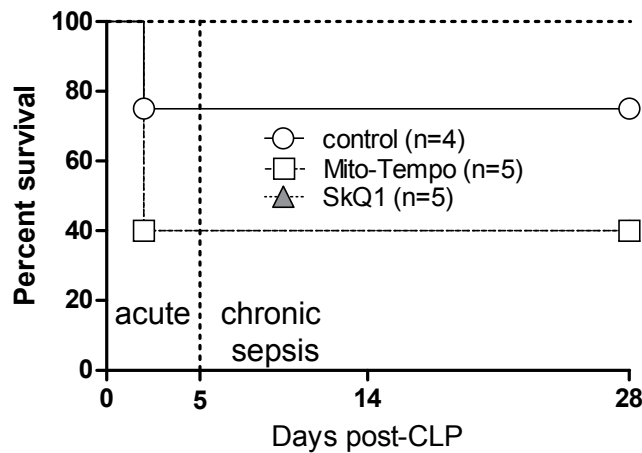

CLP Run 6

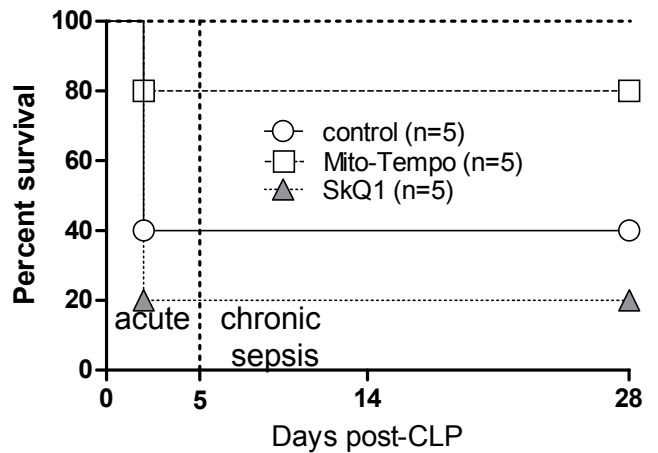

Supplement: f7 [file 6412682.f7.pdf]
